# Supplementary material for: Cross-State Differences in the Processes Generating Black–White Disparities in Neonatal Mortality
Source: Oxford University Press journal article supplement (doi:10.1215/00703370-9510578), 2021-09-27
Supplement: sosnaud_esm.pdf [file sosnaud_esm.pdf]

## Appendix A

Difference in percentage of births to mothers classified as highly educated pre vs. post revision in 14 states that adopted the revised birth certificate between 2003 and 2010

| State           | Year adopting revised birth certificate | % of births to mothers classified as highly educated in year pre-revision | % of births to mothers classified as highly educated in year of revision | Difference pre – post % |
|-----------------|-----------------------------------------|---------------------------------------------------------------------------|--------------------------------------------------------------------------|-------------------------|
| NV              | 2009                                    | 17.84%                                                                    | 18.79%                                                                   | -0.95%                  |
| NY <sup>1</sup> | 2008 <sup>1</sup>                       | 29.80%                                                                    | 30.58%                                                                   | -0.78%                  |
| MO              | 2010                                    | 28.26%                                                                    | 27.75%                                                                   | 0.51%                   |
| PA              | 2003                                    | 29.59%                                                                    | 29.01%                                                                   | 0.58%                   |
| IL              | 2010                                    | 33.63%                                                                    | 32.87%                                                                   | 0.76%                   |
| CO              | 2007                                    | 31.31%                                                                    | 30.07%                                                                   | 1.24%                   |
| TX              | 2005                                    | 19.77%                                                                    | 18.53%                                                                   | 1.25%                   |
| OK              | 2009                                    | 20.30%                                                                    | 18.82%                                                                   | 1.48%                   |
| IN              | 2007                                    | 24.20%                                                                    | 22.70%                                                                   | 1.51%                   |
| MI              | 2007                                    | 27.82%                                                                    | 26.23%                                                                   | 1.59%                   |
| TN              | 2004                                    | 22.59%                                                                    | 21.00%                                                                   | 1.59%                   |
| MD              | 2010                                    | 37.43%                                                                    | 35.80%                                                                   | 1.63%                   |
| CA              | 2006                                    | 23.70%                                                                    | 21.99%                                                                   | 1.71%                   |
| WA              | 2003                                    | 26.37%                                                                    | 24.55%                                                                   | 1.82%                   |
| SC              | 2004                                    | 22.93%                                                                    | 20.69%                                                                   | 2.24%                   |
| KY              | 2004                                    | 22.27%                                                                    | 19.71%                                                                   | 2.56%                   |
| OH              | 2006                                    | 27.99%                                                                    | 25.30%                                                                   | 2.69%                   |
| KS              | 2005                                    | 29.65%                                                                    | 26.82%                                                                   | 2.84%                   |
| <b>Average</b>  |                                         | <b>26.42%</b>                                                             | <b>25.07%</b>                                                            | <b>1.35%</b>            |

### Notes:

Source: Linked-birth death certificate data 2003-2010

<sup>1</sup> Hospitals in New York City adopted the revised birth certificate in 2004

## Appendix B

Neonatal mortality rates (per 1,000 live births) across maternal socio-demographic characteristics

| Maternal characteristics           | Total neonatal mortality rate | White neonatal mortality rate | Black neonatal mortality rate |
|------------------------------------|-------------------------------|-------------------------------|-------------------------------|
| <b>Married</b>                     | <b>3.665</b>                  | <b>3.283</b>                  | <b>8.137</b>                  |
| Non-married                        | 5.921                         | 4.922                         | 9.156                         |
| <b>Highly educated<sup>1</sup></b> | <b>3.089</b>                  | <b>2.761</b>                  | <b>7.469</b>                  |
| Lower levels of education          | 4.634                         | 3.953                         | 8.512                         |
| <b>Married, highly educated</b>    | <b>2.937</b>                  | <b>2.718</b>                  | <b>6.918</b>                  |
| All other mothers                  | 4.649                         | 3.947                         | 8.523                         |
| <b>Number of infants</b>           | <b>65,072,216</b>             | <b>36,938,634</b>             | <b>9,509,670</b>              |

**Notes:**

Source: Linked-birth death certificate data 1995-2010

<sup>1</sup> Education-specific neonatal mortality rates exclude 879,546 infants for whom maternal education was not recorded on the birth certificate

## Appendix C

### Decomposition of Black-White disparity in neonatal mortality in select states

#### Contribution of birth weight distribution and birth weight-specific mortality to racial differences in neonatal mortality, Kentucky 1995-2010 (n = 846,302 births)

| Birth weight category | White births (n = 766,216) |                                        |                             | Black births (n = 80,086) |                                        |                             | Decomposition          |                 |                       |
|-----------------------|----------------------------|----------------------------------------|-----------------------------|---------------------------|----------------------------------------|-----------------------------|------------------------|-----------------|-----------------------|
|                       | BW distribution %          | BW-specific mortality rate (per 1,000) | Neonatal deaths (per 1,000) | BW distribution %         | BW-specific mortality rate (per 1,000) | Neonatal deaths (per 1,000) | Black-White Difference | BW distribution | BW-specific mortality |
| VLBW                  | 1.40%                      | 169.841                                | 2.374                       | 3.14%                     | 165.210                                | 5.194                       | 2.820                  | 2.926           | -0.105                |
| LBW                   | 6.73%                      | 9.072                                  | 0.611                       | 10.64%                    | 4.579                                  | 0.487                       | -0.124                 | 0.266           | -0.390                |
| NBW                   | 91.87%                     | 0.980                                  | 0.901                       | 86.22%                    | 1.144                                  | 0.986                       | 0.086                  | -0.060          | 0.146                 |
| <b>Total</b>          | <b>100%</b>                |                                        | <b>3.885</b>                | <b>100%</b>               |                                        | <b>6.668</b>                | <b>2.783</b>           | <b>3.132</b>    | <b>-0.349</b>         |

Notes: "BW" is used as an abbreviation of "Birth Weight," Percentages may not sum to 100% due to rounding

#### Contribution of birth weight distribution and birth weight-specific mortality to racial differences in neonatal mortality, Colorado 1995-2010 (n = 698,934 births)

| Birth weight category | White births (n = 653,316) |                                        |                             | Black births (n = 45,618) |                                        |                             | Decomposition          |                 |                       |
|-----------------------|----------------------------|----------------------------------------|-----------------------------|---------------------------|----------------------------------------|-----------------------------|------------------------|-----------------|-----------------------|
|                       | BW distribution %          | BW-specific mortality rate (per 1,000) | Neonatal deaths (per 1,000) | BW distribution %         | BW-specific mortality rate (per 1,000) | Neonatal deaths (per 1,000) | Black-White Difference | BW distribution | BW-specific mortality |
| VLBW                  | 1.19%                      | 204.000                                | 2.420                       | 2.84%                     | 289.129                                | 8.220                       | 5.800                  | 4.085           | 1.715                 |
| LBW                   | 7.26%                      | 6.911                                  | 0.502                       | 11.94%                    | 5.326                                  | 0.636                       | 0.134                  | 0.286           | -0.152                |
| NBW                   | 91.55%                     | 0.823                                  | 0.753                       | 85.22%                    | 1.235                                  | 1.052                       | 0.299                  | -0.065          | 0.364                 |
| <b>Total</b>          | <b>100%</b>                |                                        | <b>3.675</b>                | <b>100%</b>               |                                        | <b>9.908</b>                | <b>6.233</b>           | <b>4.306</b>    | <b>1.927</b>          |

Notes: "BW" is used as an abbreviation of "Birth Weight," Percentages may not sum to 100% due to rounding
